# Supplementary material
Source: Research Square preprint supplement (doi:10.21203/rs.3.rs-9585179/v1)
Supplement: Supplementary file 1 [file bc26aba6479a8d1dfb69b3bf.docx]

**A synthetic biology tool that utilizes β-estradiol to enable tight and tunable gene expression in aspergilli with a wide dynamic range**

Masaki Yokoyama, Sohta Sagara, Tomoko Shintani, Katsuya Gomi, Takahiro Shintani*

Graduate School of Agricultural Science, Tohoku University, 468-1 Aoba, Aramaki, Aoba-ku, Sendai 980-8572, Japan

*Corresponding author: [takahiro.shintani.d7@tohoku.ac.jp](mailto:takahiro.shintani.d7@tohoku.ac.jp)

**Supplemental Information**

***A. oryzae* and *A. nidulans* parental strains used in this study**

The parental strains used are listed in Table S1.

The *ΔligD niaD−**ΔadeA::ptrA* strain constructed by Zhang et al. [1] was designated ligD_NA1 in this study. Subsequently, following the method described by Zhang et al. [1], the *ptrA* gene was deleted from ligD_NA1 to generate ligD_NA2. The strain ligD_NA2 was used as the parental strain in Figures 1, 2, 4, and 5.

**Plasmid construction**

The oligonucleotides used for plasmid construction are shown in Table S2.

Structure of plasmids derived from pBS-AoadeA, pBS-AoniaD, pBS-AnargB, and pBS-AnbiA were shown in Figure S1-S4.

*pBS-AoadeA*

The *A. oryzae* *adeA* gene and its downstream region were PCR-amplified with the combination of oligonucleotides oTAKA533 and oTAKA534 and that of oTAKA535 and oTAKA536, respectively. These PCR products and SacI/KpnI-digested pBluescript II SK(+) (Agilent Technologies) were assembled by seamless ligation to generate pBS-AoadeA.

*pBS-AoadeA-GUS*

The DNA fragment coding the *E. coli* β-glucuronidase (GUS) gene *uidA* was PCR-amplified from the pNGAG1 [2] using oligonucleotides oMY203 and oMY204. The resulting PCR product was then inserted into KpnI/EcoRI-digested FRP793 (Addgene, Watertown, MA, USA) [3], which contains the *lexO−minCYC1* fragment, by seamless ligation to obtain FRP-GUS. Subsequently, the *uidA* fragment was amplified from FRP-GUS using oligonucleotides oMY209 and oMY210 and was assembled with the PstI-digested pBS-AoadeA by seamless ligation, generating pBS-AoadeA-GUS.

pBS-AoadeA-lexO-GUS: The DNA fragment excised from FRP793 with NotI and PstI was ligated to the NotI/PstI-digested pBS-AoadeA-GUS to obtain pBS-AoadeA-lexO-GUS.

*pBS-AoniaD*

The DNA region downstream of *niaD* gene was PCR-amplified from *A. oryzae* genomic DNA using oligonucleotides oTAKA523 and oTAKA524 and that of oTAKA525 and oTAKA526, respectively. These PCR products and SacI-digested pBluescript II SK(+) were assembled by seamless ligation to generate pBS-AoniaD.

*pBS-AoniaD-XEV*

The promoter region of *A. oryzae* *actA* was amplified with oligonucleotides oMY211 and oMY212 and was assembled with KpnI-digested pPTRI (Takara Bio) via In-Fusion cloning to generate pPTRI-PactA. The terminator region of *agdA* amplified by PCR from *A. oryzae* genomic DNA with primers oMY213 and oMY214 was assembled with the KpnI-digested pPTRI-PactA via In-Fusion cloning to produce pPTRI-PactA-TagdA. Then, the DNA fragment, coding the fusion protein of LexA DNA binding domain, human estrogen nuclear receptor α ligand-binding domain, and transcriptional activation domain of herpes simplex virus protein VP16, excised from FRP467 (Addgene, Watertown, MA, USA) [3] with SpeI and XhoI was ligated to the SpeI/XhoI-digested pPTRI-PactA-TagdA to generate pPTRI-XEV. Finally, to replace the *ptrA* marker with the *niaD* marker, pBS-AoniaD was digested with SpeI and XhoI, and the fragment amplified from pPTRI-XEV using oligonucleotides oMY223 and oMY224 was inserted by seamless ligation. The resulting plasmid was designated pBS-AoniaD-XEV.

*pBS-AoadeA-amyBp-GUS*

The promoter region of *amyB* amplified from *A. oryzae* genomic DNA by PCR using the oligonucleotideso MY237 and oMY238 was assembled with the PstI/SpeI-digested pBS-AoadeA-GUS via seamless ligation to generate pBS-AoadeA-amyBp-GUS.

*pBSC-lexO-amyR*

The NotI/SpeI fragment containing the *lexO–minCYC1* cassette from FRP793 was ligated into NotI/SpeI-digested pBluescript II KS(+), generating pBS-lexO. The *amyR* gene amplified from *A. oryzae* genomic DNA using oligonucleotides oMY246 and oMY247 was ligated into SpeI/KpnI-digested pBS-lexO to generate pBS-lexO-amyR. Subsequently, the *A. nidulans sC* (ATP sulfurylase gene), amplified from pUSC [4] using oligonucleotides oMY248 and oMY249, was assembled with NotI-digested pBS-lexO-amyR using the NEBuilder HiFi DNA Assembly kit (New England Biolabs, Ipswich, MA, USA), generating pBSC-lexO-amyR-Δup, which lacks the upstream region of the *amyR* gene. Finally, the upstream region of the *amyR* gene was PCR-amplified using oligonucleotides oMY250 and oMY251, digested with NotI and BamHI, and ligated into NotI/BamHI-digested pBSC-lexO-amyR-Δup to generate pBSC-lexO-amyR.

*pBS-AoniaD-enoAp-XEV*

The promoter region of *enoA* was PCR-amplified with the combination of oligonucleotides oMY259 and oMY260 and was assembled with the NotI/SpeI-digested pBS-AoniaD-XEV by seamless ligation, generating pBS-AoniaD-enoAp-XEV.

*pBS-AoadeA-lexOgpdAcp-GUS*

The CP region of *gpdA* was PCR-amplified with the oligonucleotides oMY267 and oMY268, digested with XbaI and SpeI, and ligated into XbaI/SpeI-digested FRP793 to generate FRP-gpdAcp. The NotI/SpeI-digested fragment containing the *lexO–gpdAcp* cassette from FRP-gpdA was ligated into NotI/SpeI-digested pBS-AoadeA-lexO-GUS, generating pBS-AoadeA-lexOgpdAcp-GUS.

*pBS-AoadeA-lexOhhfAcp-GUS*

The CP region of *hhfA* was PCR-amplified with the oligonucleotides oMY269 and oMY270, digested with XbaI and SpeI, and ligated into XbaI/SpeI-digested FRP793 to generate FRP-hhfAcp. The NotI/SpeI-digested fragment containing the *lexO–hhfAcp* cassette from FRP-hhfA was ligated into NotI/SpeI-digested pBS-AoadeA-lexO-GUS, generating pBS-AoadeA-lexOhhfAcp-GUS.

*pBS-AnbiA*

The *A. nidulans* *biA* gene was PCR-amplified from *A. nidulans* genomic DNA using oligonucleotides oTAKA557 and oTAKA578. The PCR product and SacI-digested pBluescript II SK(+) were assembled by seamless ligation to generate pBS-AnbiAup. Next, the *biA* downstream fragment amplified by PCR from *A. nidulans* genomic DNA using oligonucleotides oTAKA559 and oTAKA560 and then was ligated to the KpnI-digested pBS-AnbiAup by seamless ligation to generate pBS-AnbiA.

*pBS-AobiA-lexO-GUS*

The DNA fragment excised from pBS-AoadeA-lexO-GUS with KpnI and SacI was ligated to the KpnI/SacI-digested pBS-AnbiA to obtain pBS-AnbiA-lexO-GUS.

*pBSargB-amyB-3GS-TagdA*

The upstream and downstream regions of *A. nidulans* *argB* (amplified with oligonucleotides oTAKA542/oTAKA543 and oTAKA544/oTAKA545, respectively), the *amyB*-*agdAt* fragment from pBSN-amyB-3GS-TagdA, which will be described elsewhere, and SacI/KpnI-digested pBluescript II SK(+) were assembled by seamless ligation to generate pBSargB-amyB-3GS-TagdA.

*pBS-AnargB-gpdAp-XEV*

The DNA fragment excised from pBS-AoniaD-XEV with NotI and KpnI was ligated to the NotI/KpnI-digested pBSargB-amyB-3GS-TagdA to obtain pBS-AnargB-XEV. Then, to replace the *A. oryzae actA* promoter with *A. nidulans gpdA* promoter, the promoter region of the *gpdA* gene, PCR-amplified with the oligonucleotides 5'An_gpdA-NotI-XE and 3'An_gpdA-EcoRI-XE, was inserted to NotI/EcoRI-digested pBS-AnargB-XEV by seamless ligation. The resulting plasmid was designated pBS-AnargB-gpdAp-XEV.

**Table S1. The parental strain used in this study.**

| **Strain name** | **Strain origin** | **Genotype** | **Reference or sources** | **Use in this study** |
| --- | --- | --- | --- | --- |
| *Aspergillus oryzae* |  |  |  |  |
| RIB40 |  |  | [5] | Control stain in Fig. 3 |
| NS4 | RIB40 | *niaD− sC−* | [4] | Background strain |
| ligD_NA1 | NS4 | *ΔligD::sC* *niaD− ΔadeA*::*ptrA* | [1] | Background strain |
| ligD_NA2 | ligD_NA1 | *ΔligD::sC niaD−* *ΔadeA* | This study | Parent strain in Figs. 1, 2, 4, and 5 |
| *ΔligD::ptrA* | NS4 | *ΔligD::ptrA* *niaD− sC−* | [6] | Parent strain in Fig. 3 |
| *ΔamyR* | NS4 | *ΔamyR::sC niaD−* | [7] | Control strain in Fig. 3 |
| *Aspergillus nidulans* |  |  |  |  |
| WG355 |  | *biA1* *argB2* *bgA0* | [8] | Parent strain in Fig. 6 |

**Table S2. Primers used for plasmid construction.**

| Primer | Sequence (5′ → 3′) |
| --- | --- |
| oMY203 | GTGGATCCCCCGGGCTGCAGGAATTCACCGGGTGGTCAGTCCCTTAT |
| oMY204 | TGGGTACACGGCCGAAGCTGGGTACCGGTGTACGCTTGGTAAAGTTGT |
| oMY209 | AGTGGATCCCCCGGGCTGCAGATTCACCGGGTGGTCAGT |
| oMY210 | ACTATACAAATTGGAATTCCTGGGTACCGGTGTACGCTT |
| oMY211 | AGTGAATTCGAGCTCGGTACGGACCCTAGACAAAAGGTGATTC |
| oMY212 | CTAGAGGATCCCCGGGTACCACTAGTGATGACTGAATAGGATTACTACGAGGG |
| oMY213 | TCATCACTAGTGGTACACTCGAGTCGGGAATTGCTACCGCT |
| oMY214 | TCTAGAGGATCCCCGGGTACCGGTGTACGCTTGGTAAAGTTGT |
| oMY219 | CTCTACGAGATGCTGTCGC |
| oMY220 | TGTCTGGAGATGATGTCGAGTC |
| oMY223 | GCGGTGGCGGCCGCTCTAGAGGACCCTAGACAAAAGGTGATTC |
| oMY224 | CAAAAGGTACCGGGCCCCCCGGTGTACGCTTGGTAAAGTTGT |
| oMY228 | CGATATGTACTGGTCCGTTCTC |
| oMY229 | CATCCTTGAGTGCTTTTAAAC |
| oTAKA533 | TATAGGGCGAATTGGGTACGGCGCGCCAAACATGGCTTTGTTGATCTAAAG |
| oTAKA534 | TCCCCCGGGCTGCAGGAATTCCAATTTGTATAGTAATTTATATTTTTAGGTCTCTATACCAG |
| oTAKA535 | TCCTGCAGCCCGGGGGATCCACTAGTTCTAGAGCGGCCGCAACCTGGTATCCATTTACTGATCCC |
| oTAKA536 | GGGAACAAAAGCTGGAGCTGGCGCGCCGACGAAACCCTACGTTC |
| oMY237 | CAGGTTGCGGCCGCTCTAGAACTAGTGGGAAAAAGGATTACGTTGAAGGG |
| oMY238 | GGACTGACCACCCGGTGAATCTGCAGAAATGCCTTCTGTGGGGTTTATTGTTC |
| oTAKA523 | GGGAACAAAAGCTGGGGCGCGCCGATTGATTGAGCAAGGGAAC |
| oTAKA524 | CCGCCACCGCGGTGGAGCTCTCGTACCGAAAATACTTTCCAGC |

**Table S2. Continued.**

| Primer | Sequence (5′ → 3′) |
| --- | --- |
| oTAKA525 | TATAGGGCGAATTGGGGCGCGCCGGGTTACAATTACGAAGG |
| oTAKA526 | TCGAGGGGGGGCCCGGTACCTTTTGACATTTGCTCCATTGTCG |
| oMY246 | GCTACTAGTCCGAGCATGTCTCATTCTCC |
| oMY247 | GTCGGTACCGCCATTGCTGAGTGATGAGG |
| oMY248 | GGAGCTCCACCGCGGTGGCGGCCGCCGGGGATCCTCTAGAGTCAT |
| oMY249 | AGGTTTATATATTATTGCGGCCTTGCATGCCTGCAGGTCAG |
| oMY250 | TTGGCGGCCGCCGAGCAAAGGACGAGACC |
| oMY251 | CCCGGATCCAGCGAGGGATAGCGAAG |
| oMY259 | GAGAGCTCCACCGCGGTGGCGGCCGCAGTAACTATGGAGGGCAAGC |
| oMY260 | CCTGCAGCCCGGGGGATCCACTAGTTAACTTGGAGGACGGAAGAAAAG |
| oMY267 | CAGGGTCTAGATTTTCTACTCTCTTCGTATACTCACCAC |
| oMY268 | GGATCCACTAGTTGTTTAGATGTGTCTGTTGGTGTG |
| oMY269 | CAGGGTCTAGAGCGCTCTTCCTTTTCCTATA |
| oMY270 | GGATCCACTAGTATTGATGGTTGATTAAAGAGTTAACTTG |
| oTAKA557 | CTAAAGGGAACAAAAGCTGGCGCGCCTAGATGAGCTTGTTTTGAAAAAC |
| oTAKA558 | AGCGGCCGCCACCGCGGTGGAGCTCAGTGAACCTGAGCTAGTG |
| oTAKA559 | CGACCTCGAGGGGGGGCCCGGTACCCGGCCTCGCAGGCCC |
| oTAKA560 | CTCACTATAGGGCGAATTGGCGCGCCTCGCCTTCTCGAGGACG |
| 5'An_gpdA-NotI-XE | GCTCCACCGCGGTGGCGGCCGCGTAAGCTCCCTAATTGGC |
| 3'An_gpdA-EcoRI-XE | TGGCCGTTAACGCTTTCATGAATTCTGTGATGTCTGCTCAAGCGG |

**Table S3. Primers used for RT-qPCR experiments.**

| Primer | Sequence (5′ → 3′) | Target gene |
| --- | --- | --- |
| GUS qRT-PCR FW | GAATTTCGCCGATTTTGCGACC | *uidA* |
| GUS qRT-PCR RV2 | GTCCAGCGTTTTTGCAGCAG | *uidA* |
| hhfA sen | CAAGCGTATCTCTGCCATGA | *hhfA* |
| hhfA anti | CACCGAAACCGTAGAGGGTA | *hhfA* |


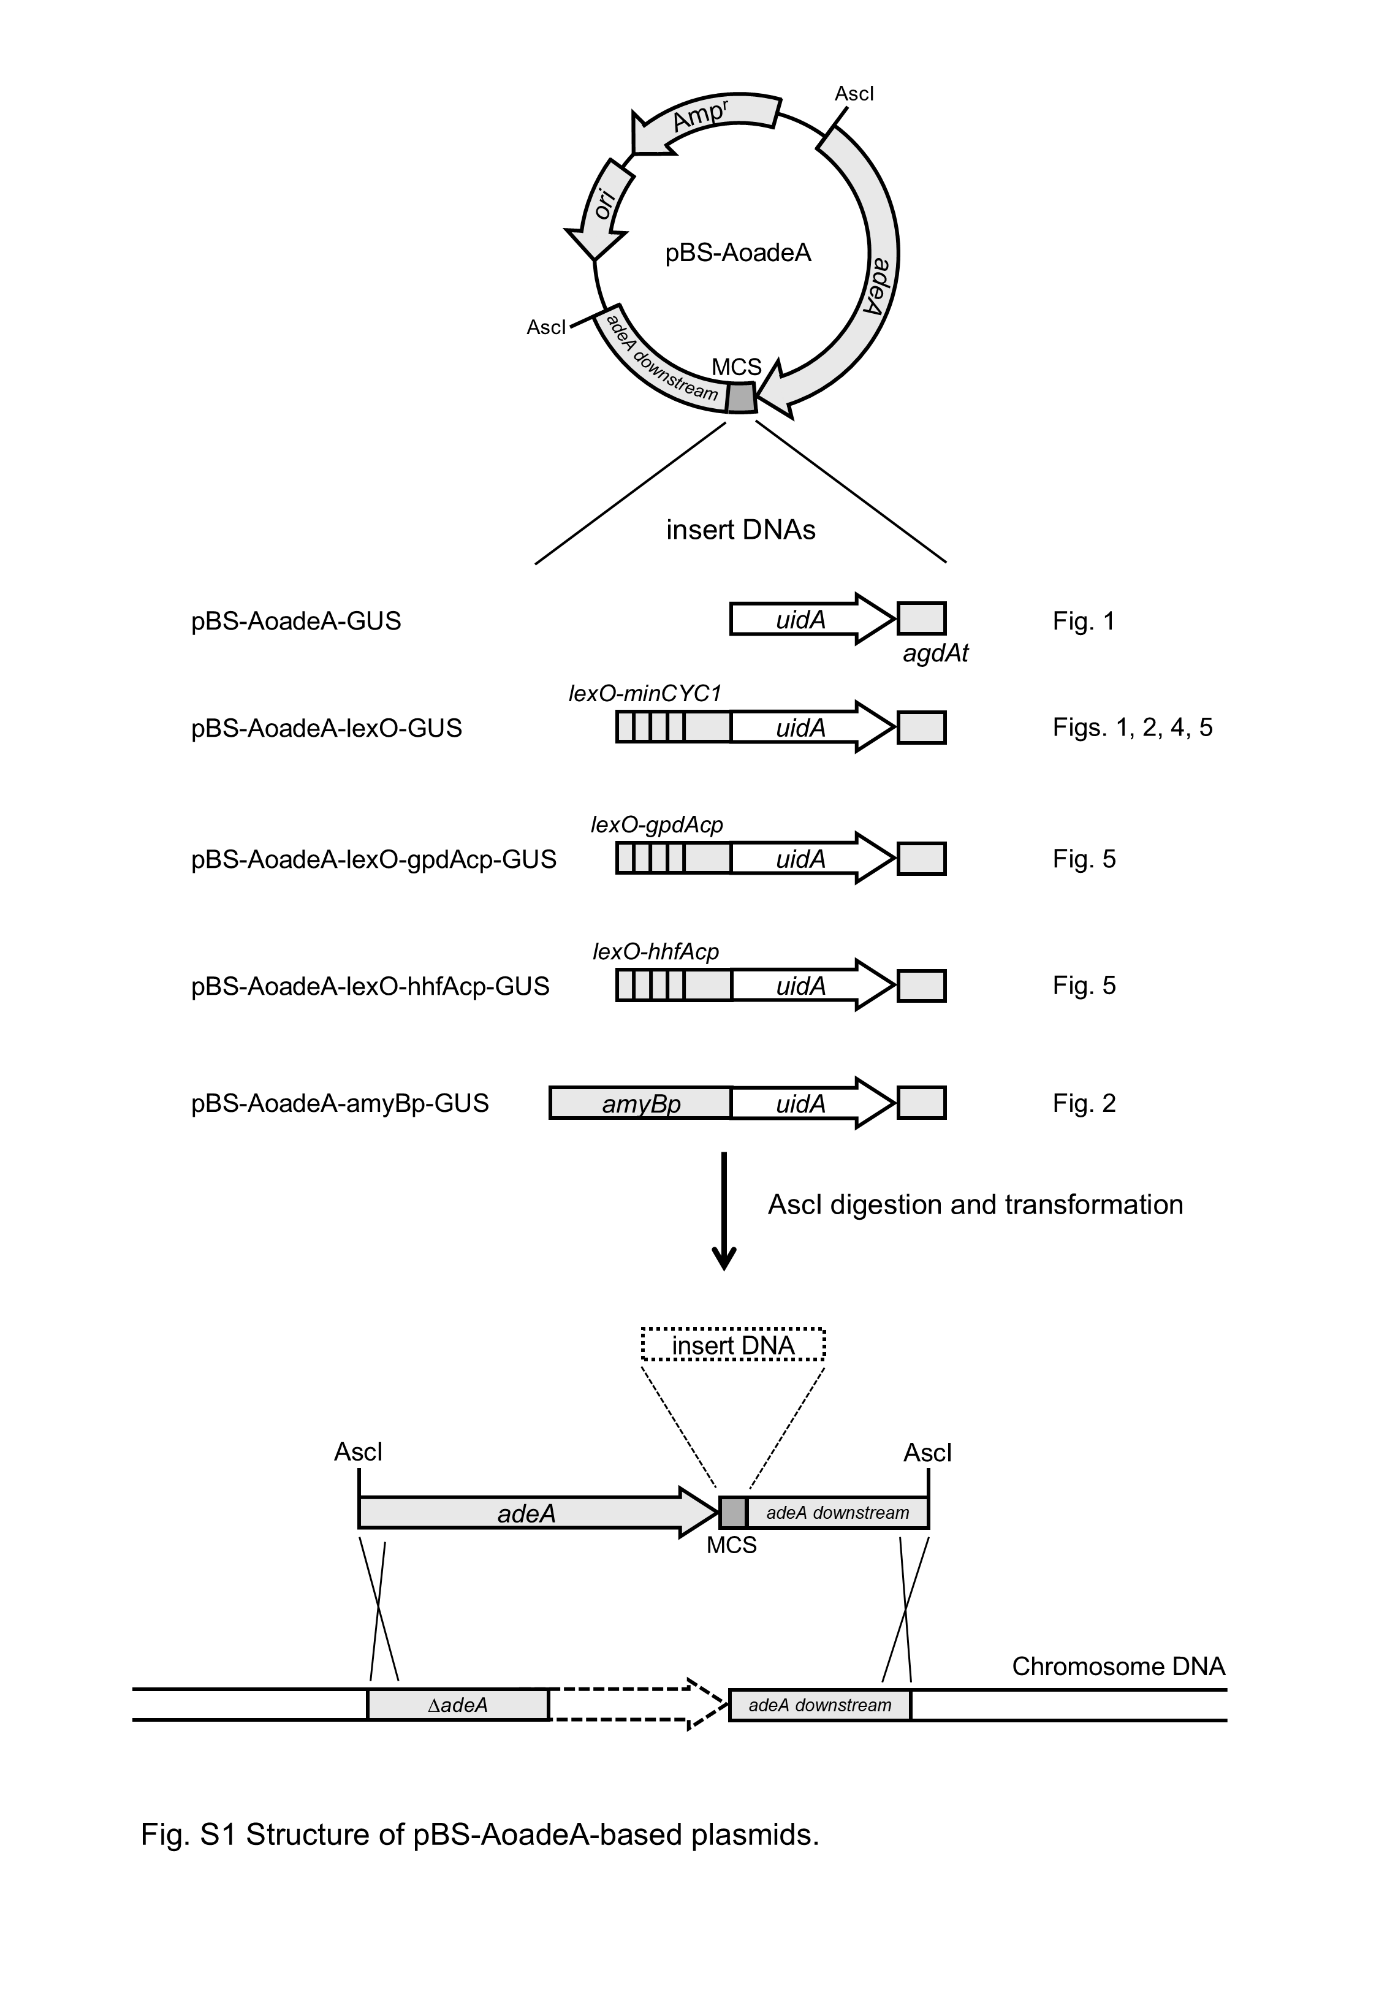


**Figure S1** Structure of pBS-AoadeA-based plasmids.


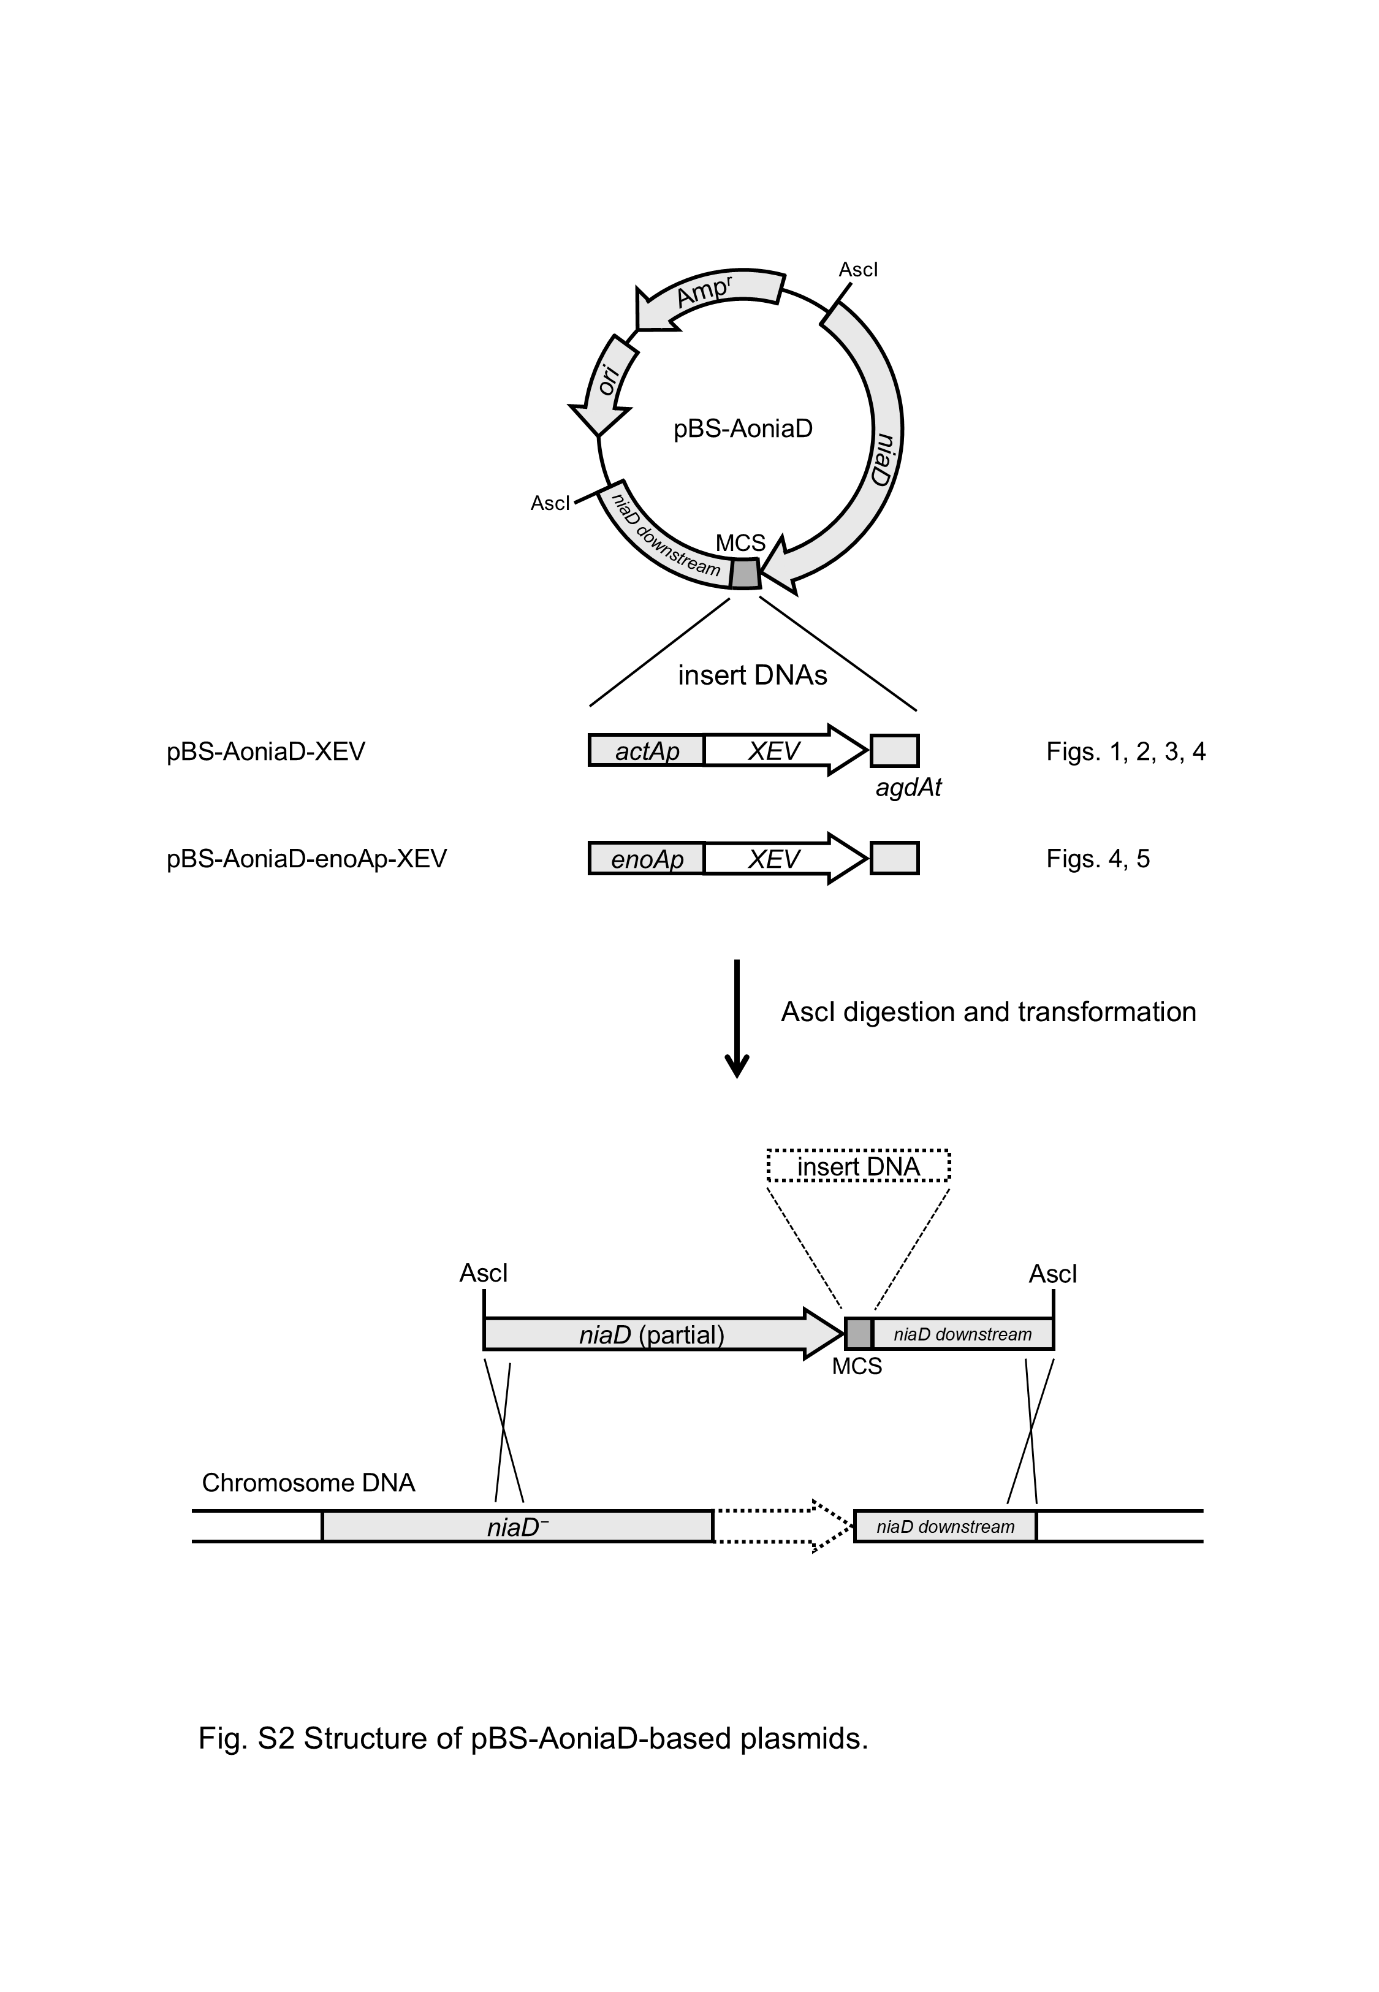


**Figure S2** Structure of pBS-AoniaD-based plasmids.


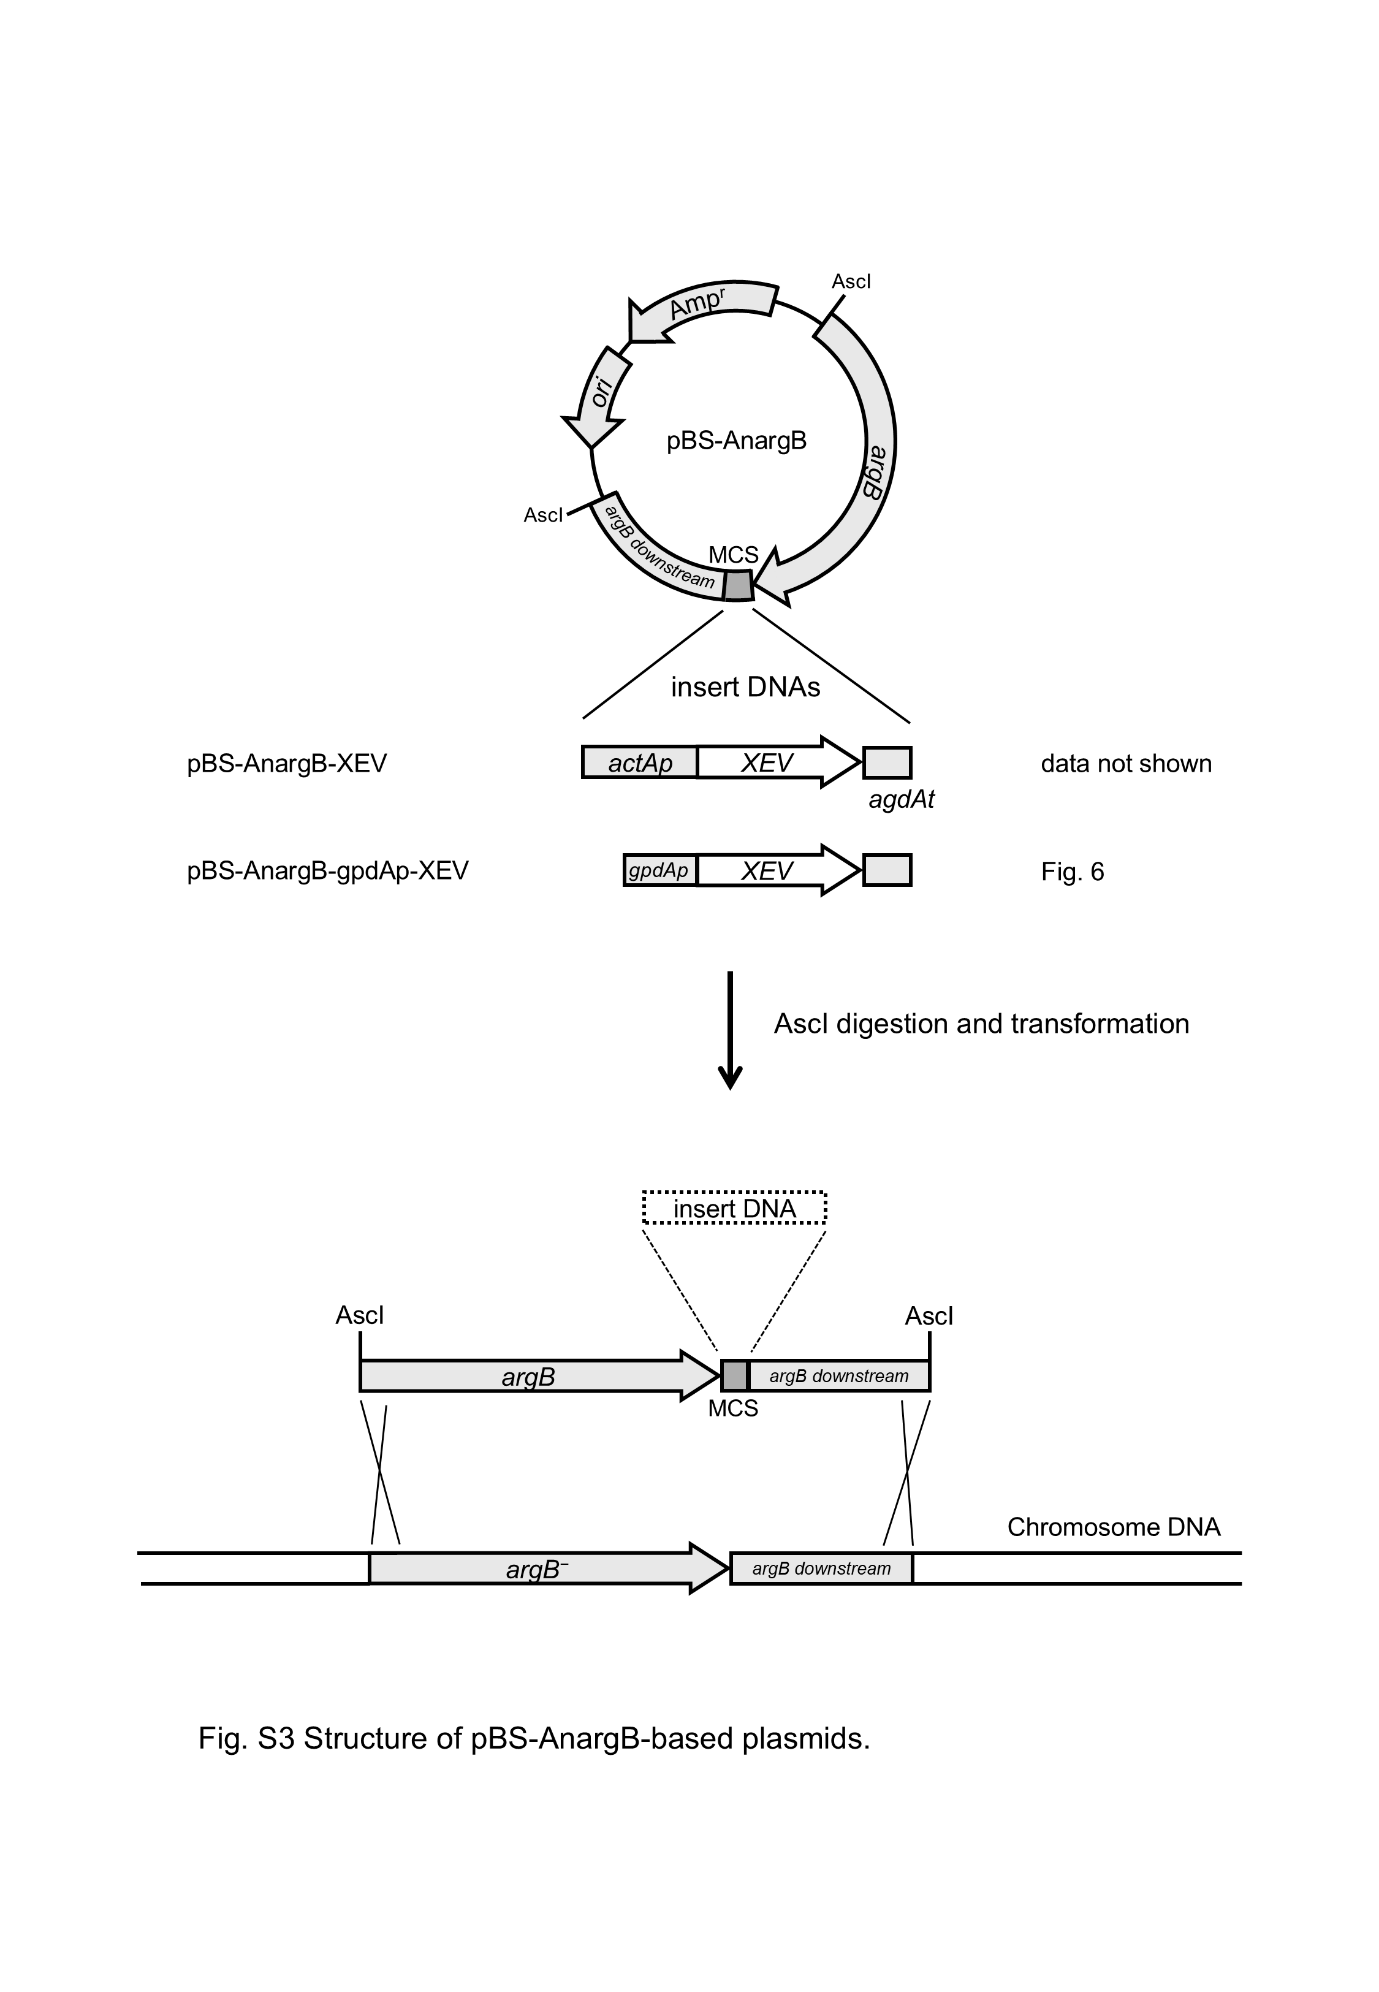


**Figure S3** Structure of pBS-AnargB-based plasmids.


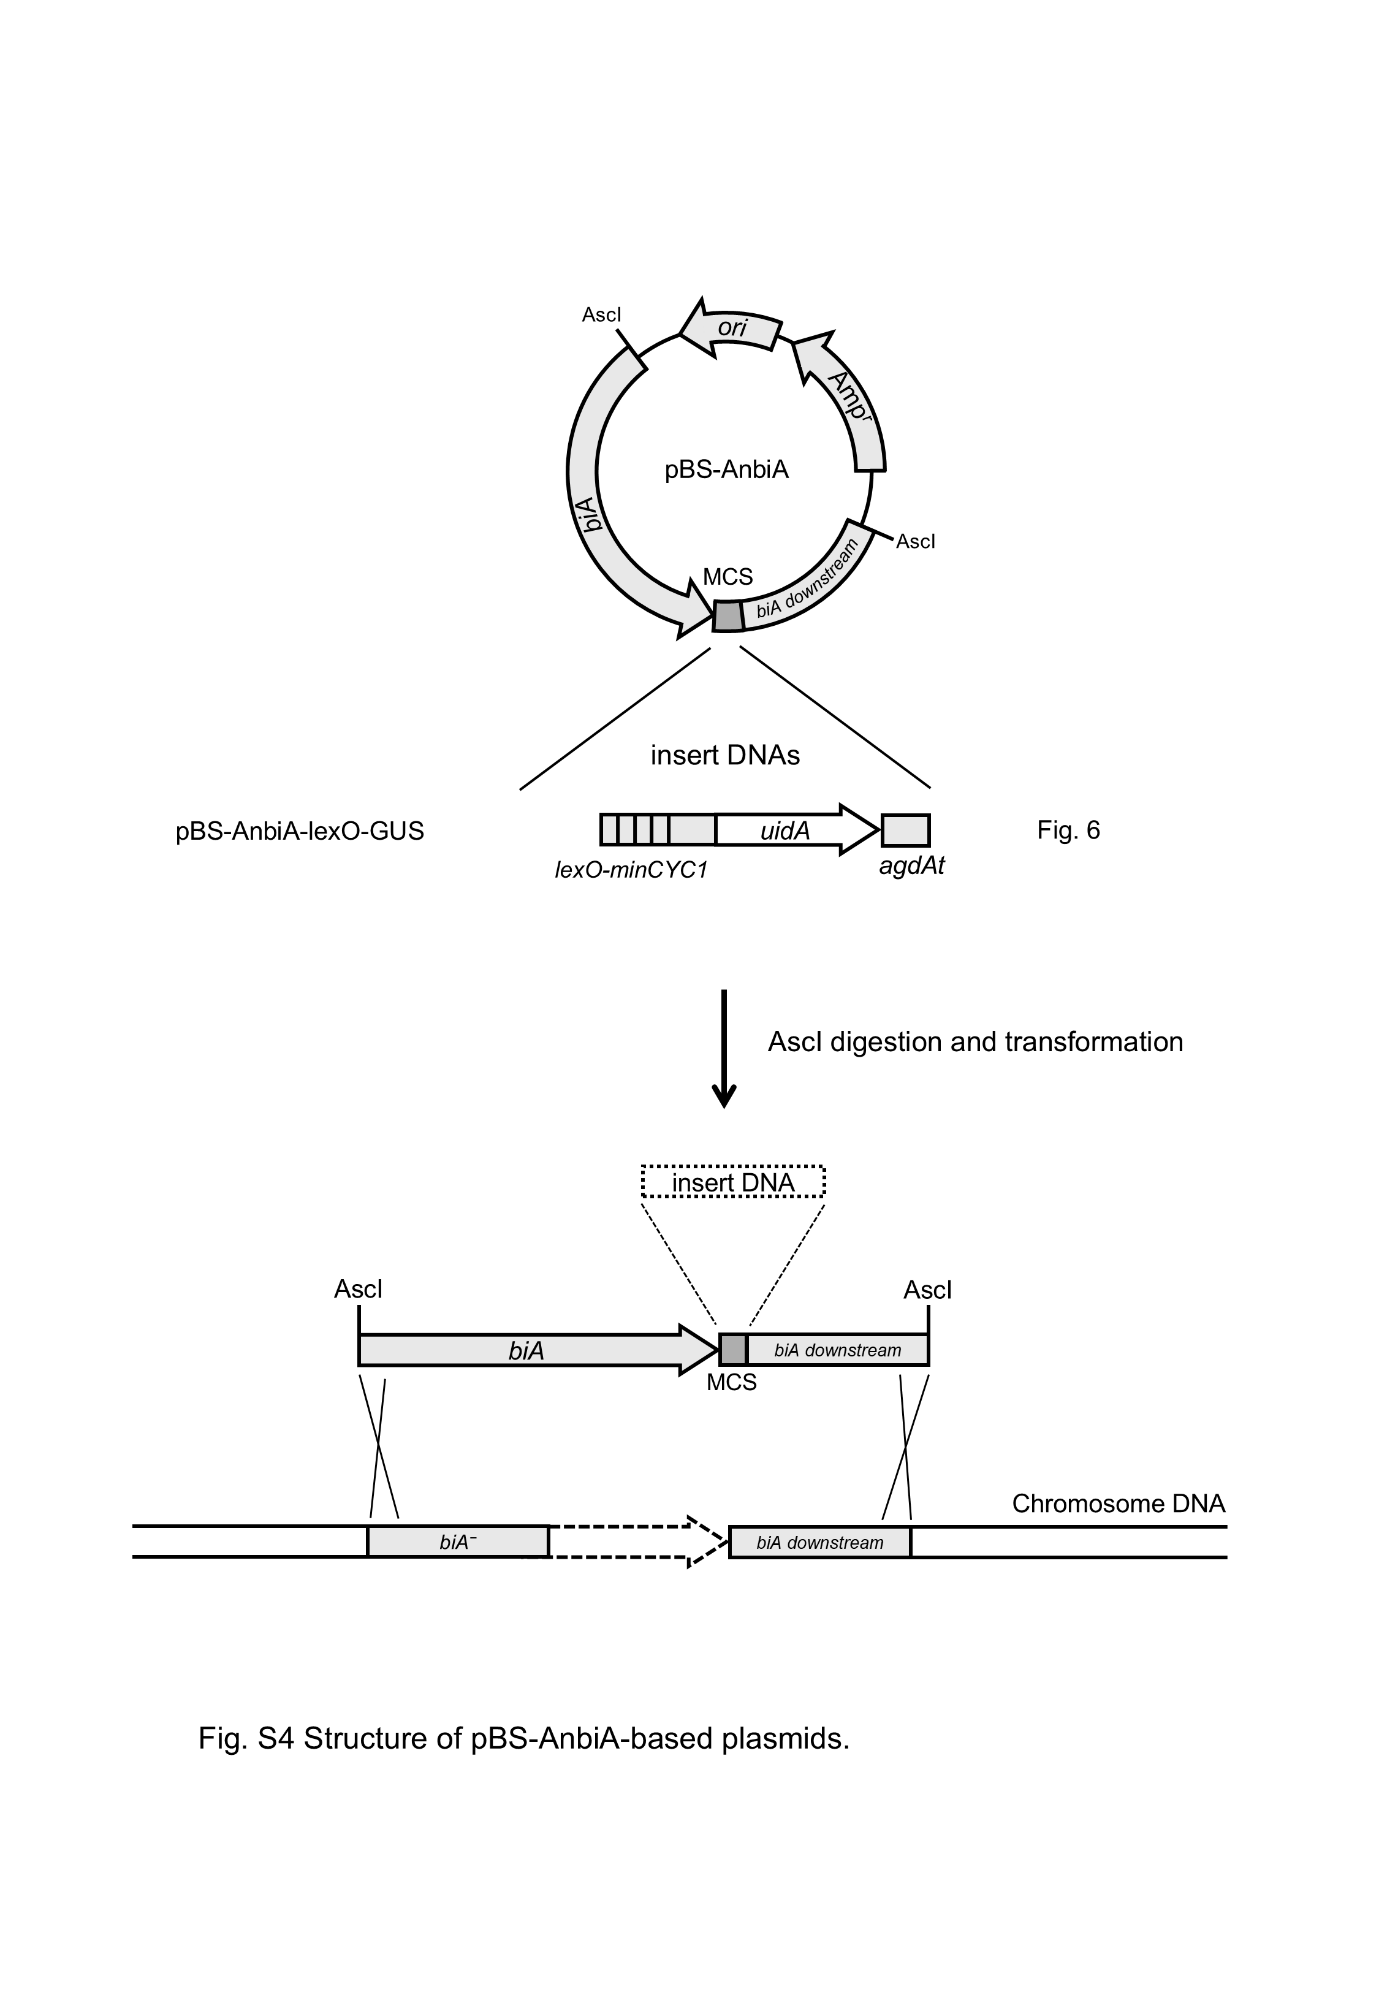


**Figure S4** Structure of pBS-AnbiA-based plasmids.


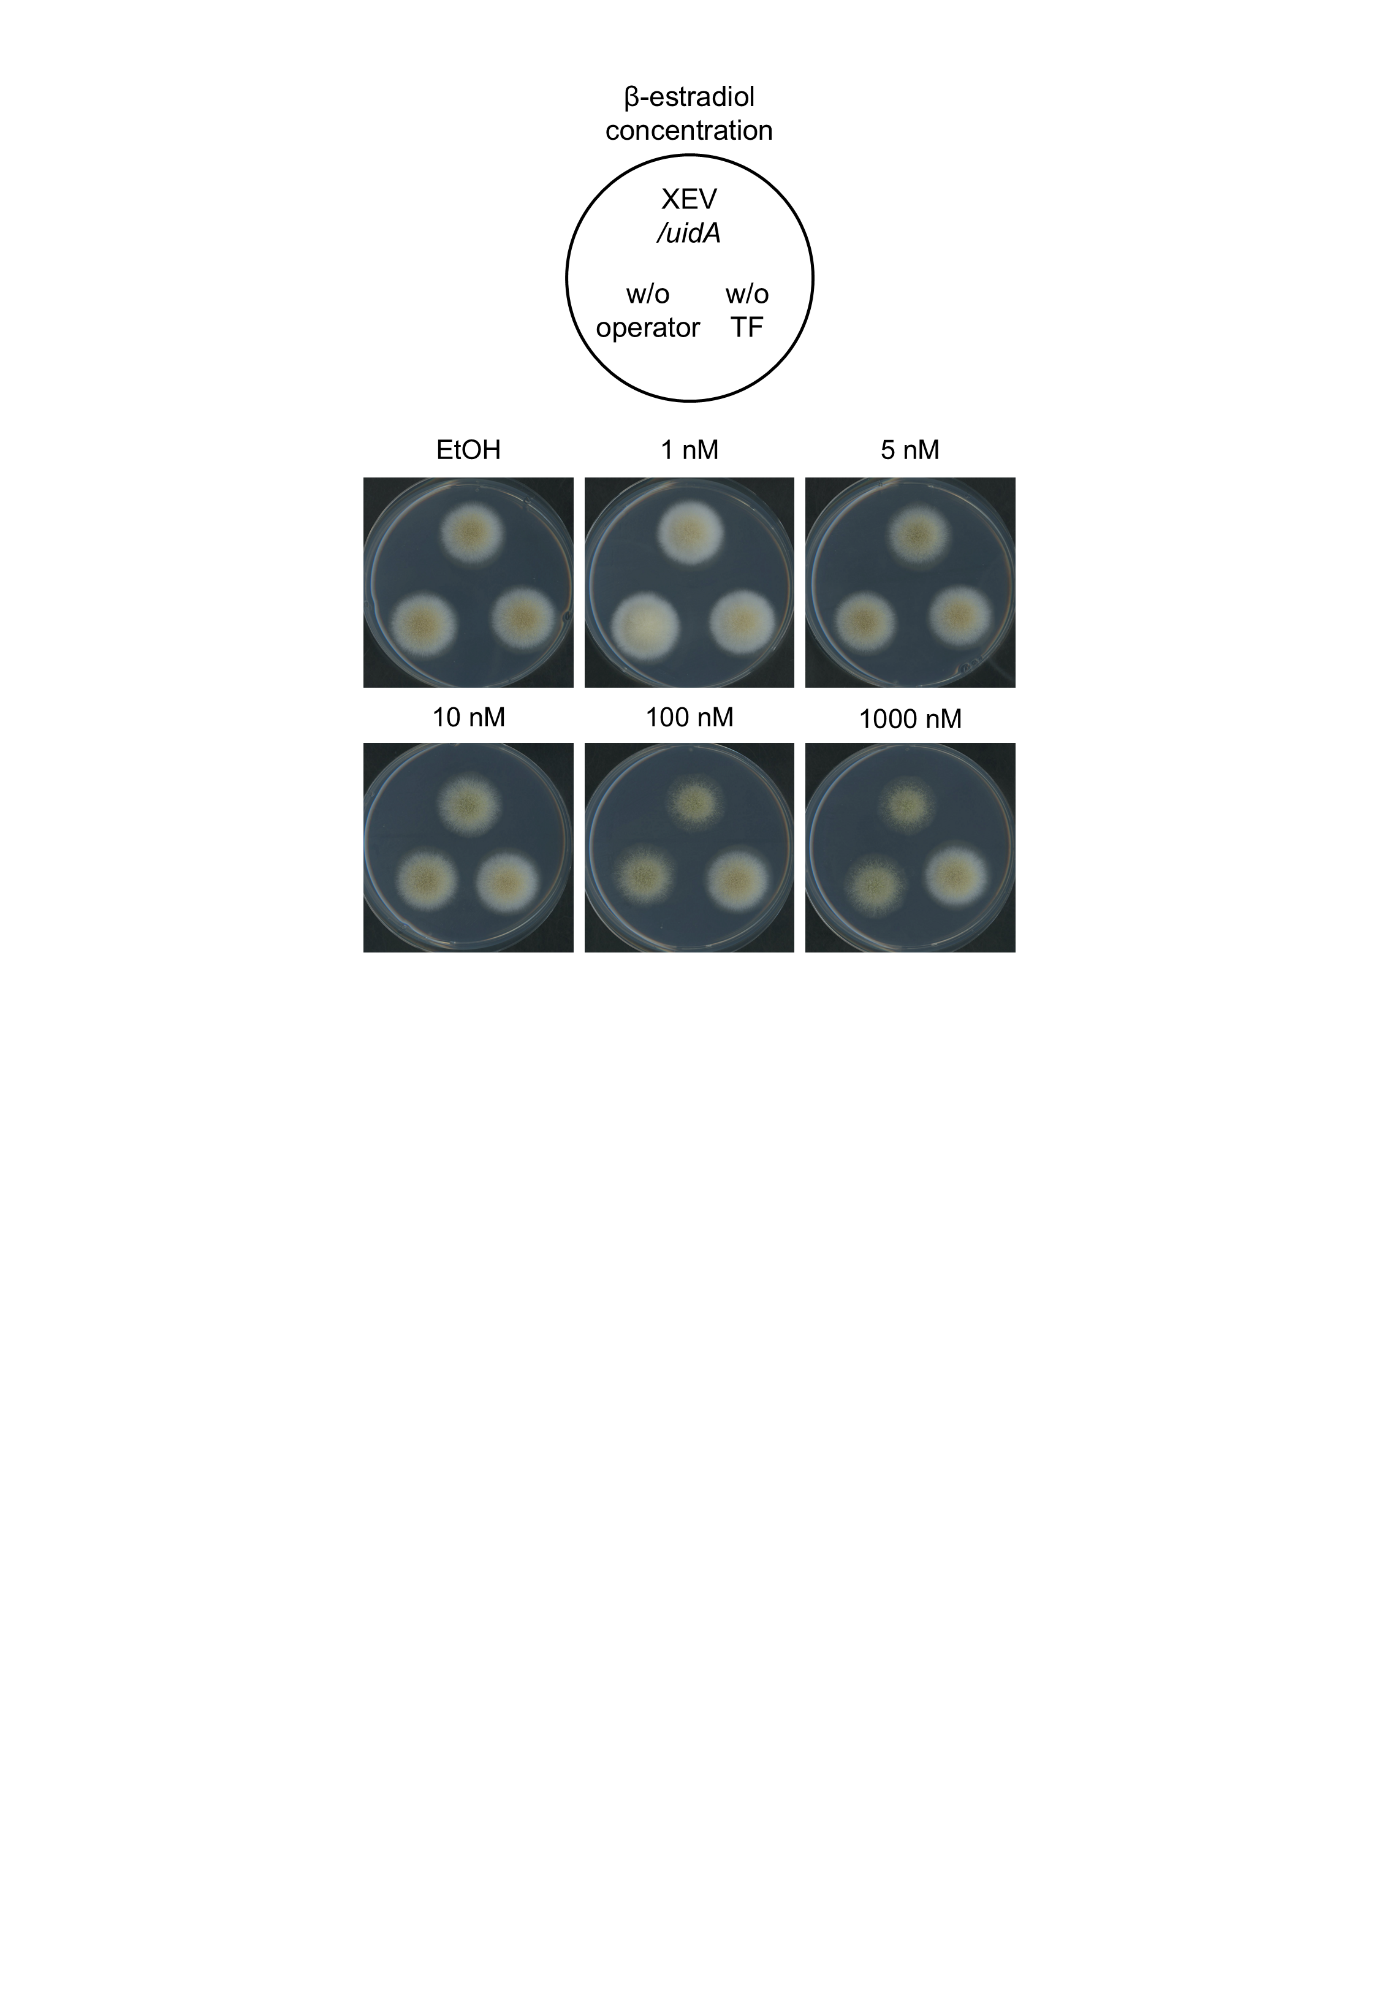


**Figure S5** Growth of XEV strains in the presence of β-estradiol. Approximately 104 conidiospores of each strain were inoculated onto minimal agar plates containing 1% glucose and β-estradiol and were grown at 30 °C for 4 days. The strains lacking the XEV transcription factor (w/o TF) and lacking *lexO-minCYC1* sequence (w/o operator) was used for control experiments. For non-induced conditions, 100% ethanol (EtOH) was added at 0.1% (v/v) as a solvent control.

**
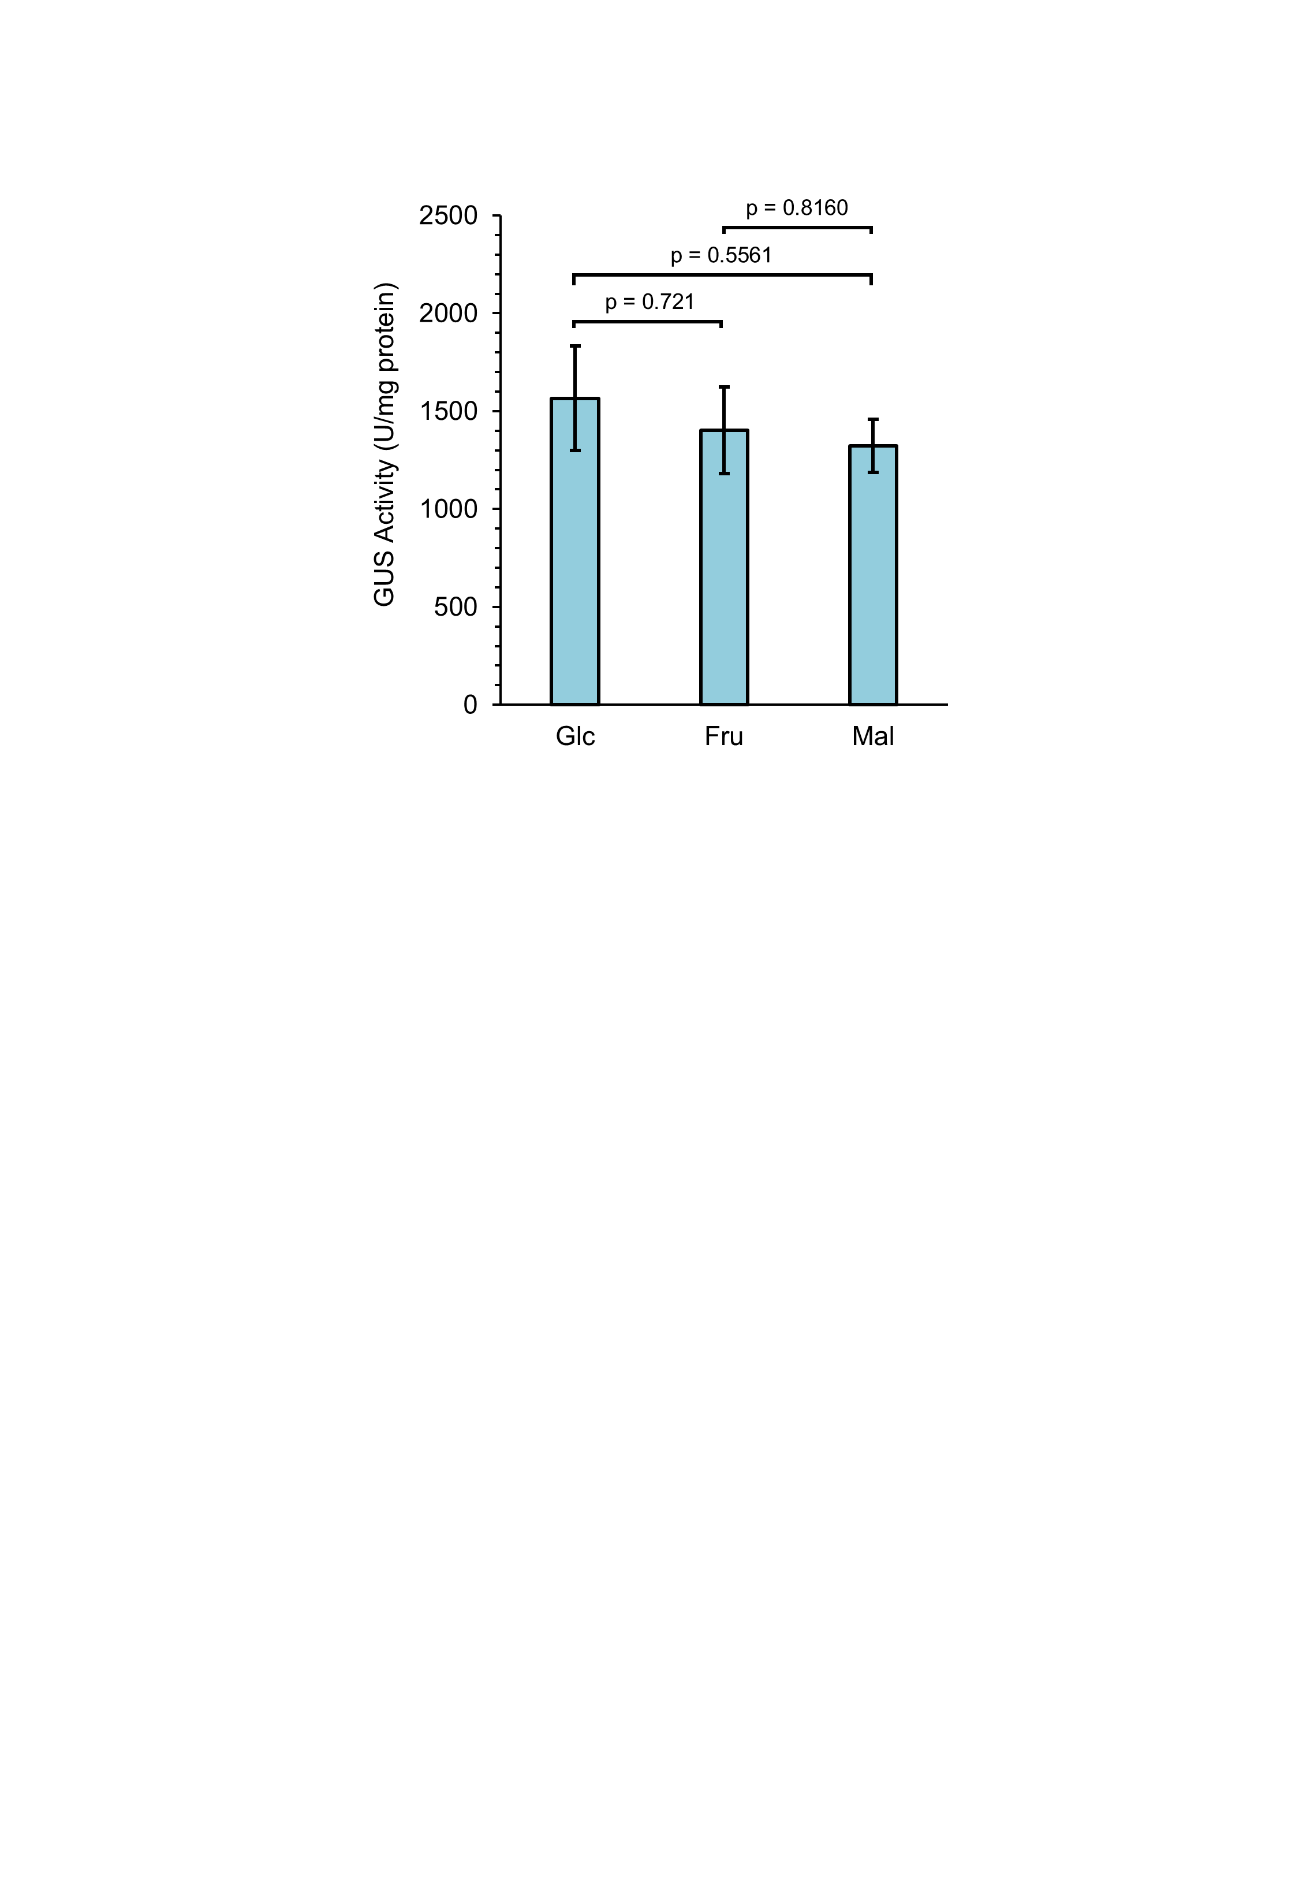
**

**Figure S6** Effects of major carbon sources on β-estradiol-induced reporter gene expression. The XEV/*uidA* strain was grown in liquid Czapek-Dox medium supplemented with 0.1% BactoTM Peptone (CDP) medium containing 1% glucose, maltose, or fructose as a carbon source for 24 hours, after which 10 nM β-estradiol was added. and an additional 24 h of incubation. Mycelial extracts were used to measure the enzyme activity of GUS, the gene product of *uidA*. Data are presented as mean ± standard error of the mean (SEM) of three independent experiments, with statistical analysis performed by one-way ANOVA followed by Tukey’s post hoc test.

**Reference**

1. Zhang S, Ban A, Ebara N, Mizutani O, Tanaka M, Shintani T, et al. Self-excising Cre/mutant lox marker recycling system for multiple gene integrations and consecutive gene deletions in *Aspergillus oryzae*. J Biosci Bioeng. 2017;123:403–11. https://doi.org/10.1016/j.jbiosc.2016.11.001.

2. Fujioka T, Mizutani O, Furukawa K, Sato N, Yoshimi A, Yamagata Y, et al. MpkA-Dependent and -independent cell wall integrity signaling in *Aspergillus nidulans*. Eukaryot Cell. 2007;6:1497–510. https://doi.org/10.1128/EC.00281-06.

3. Ottoz DSM, Rudolf F, Stelling J. Inducible, tightly regulated and growth condition-independent transcription factor in *Saccharomyces cerevisiae*. Nucleic Acids Res. 2014;42:e130. https://doi.org/10.1093/nar/gku616.

4. Yamada O, Lee BR, Gomi K. Transformation system for *Aspergillus oryzae* with double auxotrophic mutations, *niaD* and *sC*. Biosci Biotechnol Biochem. 1997;61:1367–9. https://doi.org/10.1271/bbb.61.1367.

5. Machida M, Asai K, Sano M, Tanaka T, Kumagai T, Terai G, et al. Genome sequencing and analysis of *Aspergillus oryzae*. Nature. 2005;438:1157–61. https://doi.org/10.1038/nature04300.

6. Mizutani O, Kudo Y, Saito A, Matsuura T, Inoue H, Abe K, et al. A defect of LigD (human Lig4 homolog) for nonhomologous end joining significantly improves efficiency of gene-targeting in *Aspergillus oryzae*. Fungal Genet Biol. 2008;45:878–89. https://doi.org/10.1016/j.fgb.2007.12.010.

7. Hasegawa S, Takizawa M, Suyama H, Shintani T, Gomi K. Characterization and expression analysis of a maltose-utilizing (MAL) cluster in *Aspergillus oryzae*. Fungal Genet Biol. 2010;47:1–9. https://doi.org/10.1016/j.fgb.2009.10.005.

8. Brakhage AA, Turner G. L-lysine repression of penicillin biosynthesis and the expression of penicillin biosynthesis genes *acvA* and *ipnA* in *Aspergillus nidulans*. FEMS Microbiol Lett. 1992;77:123–7. https://doi.org/10.1016/0378-1097(92)90142-b.
